# Supplementary material for: Design of Wearable EEG Devices Specialized for Passive Brain–Computer Interface Applications
Source: PubMed Central journal article supplement (PMC7472161; doi:10.3390/s20164572), 2020-08-14
Supplement: sensors-20-04572-s001.pdf [file sensors-20-04572-s001.pdf]

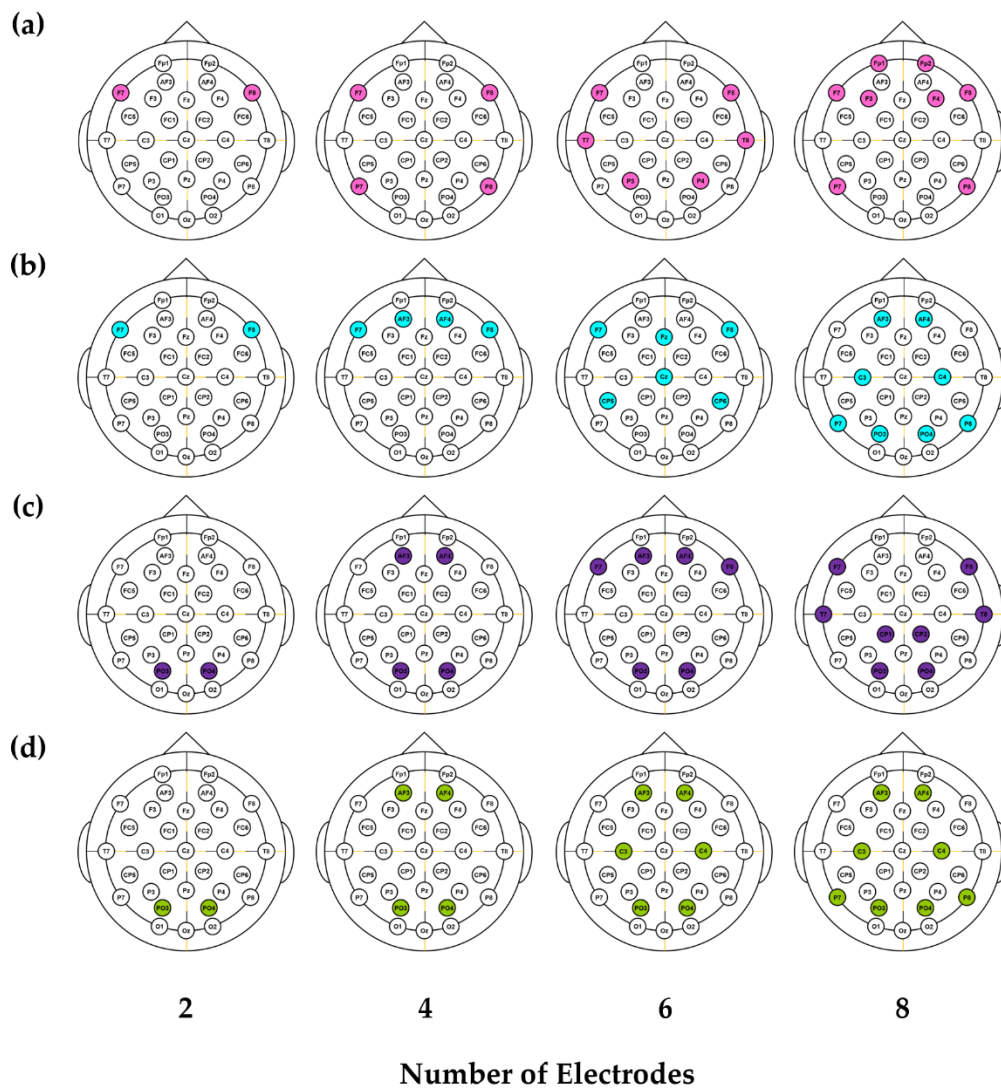

**Figure S1.** Optimal electrode configurations obtained using LDA and DT classifiers, with different numbers of electrodes: (a) LDA-based emotion-specialized design, (b) LDA-based general-purpose design, (c) DT-based emotion-specialized design, and (d) DT-based general-purpose design.

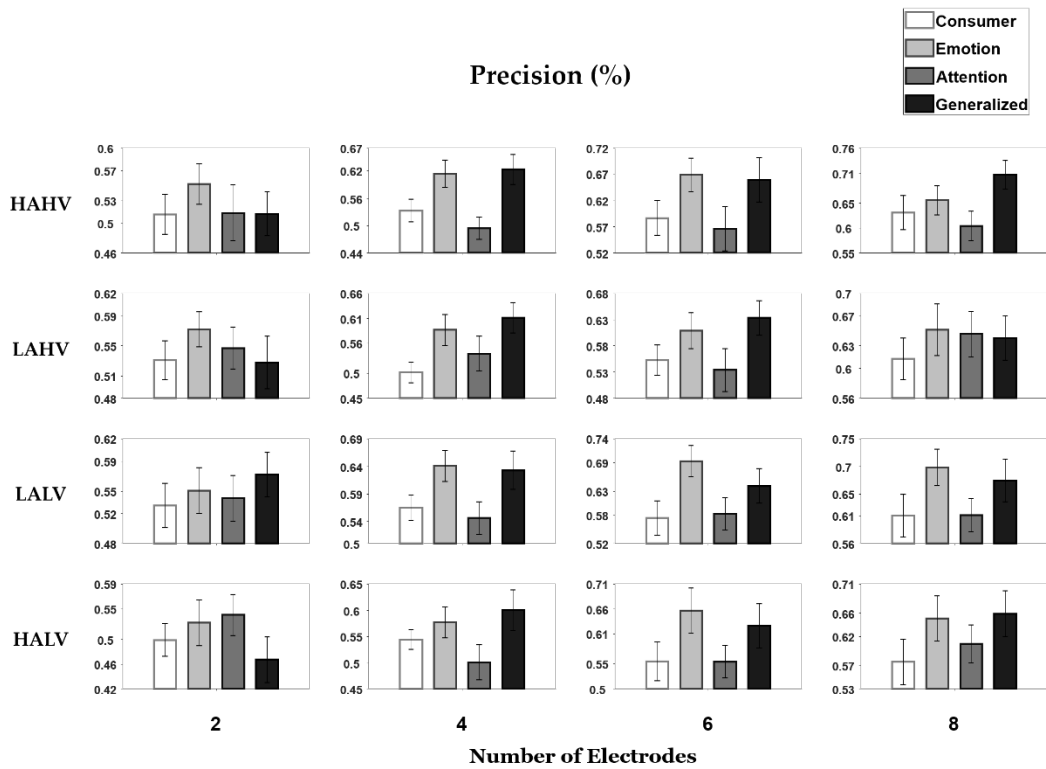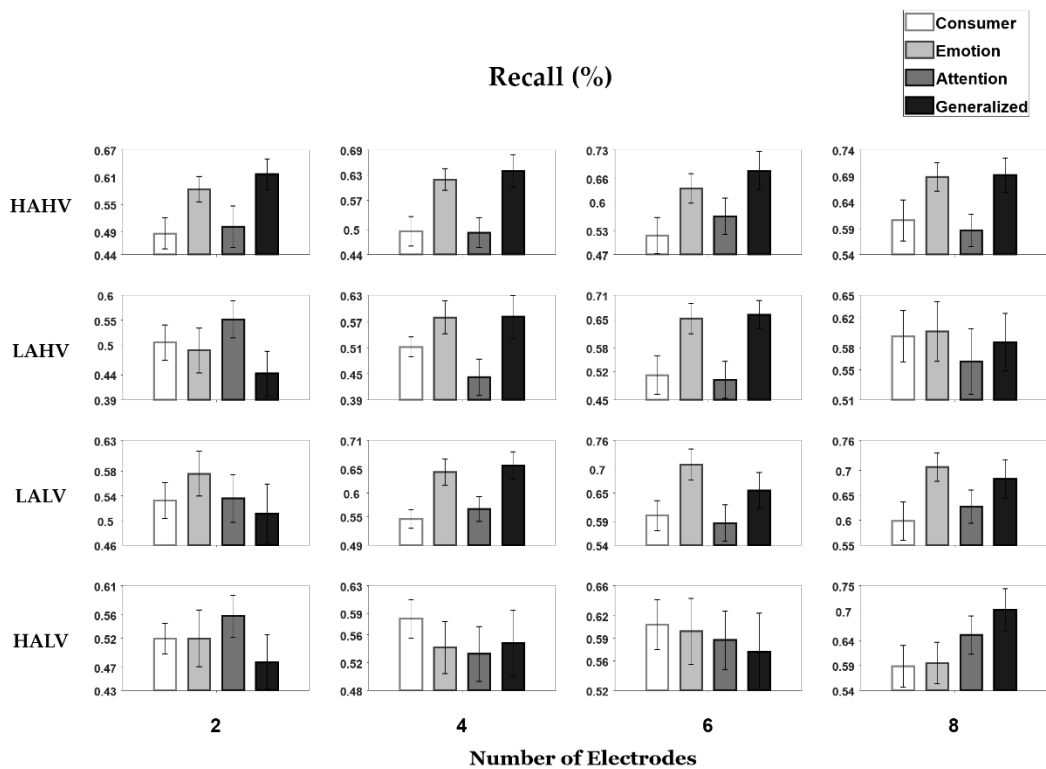

**Figure S2.** Precision and recall of each emotional state for the four types of electrode configurations, with respect to the number of electrodes. Precision and recall were computed with the following equations: Precision =  $TP/(TP+FP)$ ; Recall =  $TP/(TP+FN)$ , where TP, FP and FN represent true positive, false positive, and false negative, respectively.

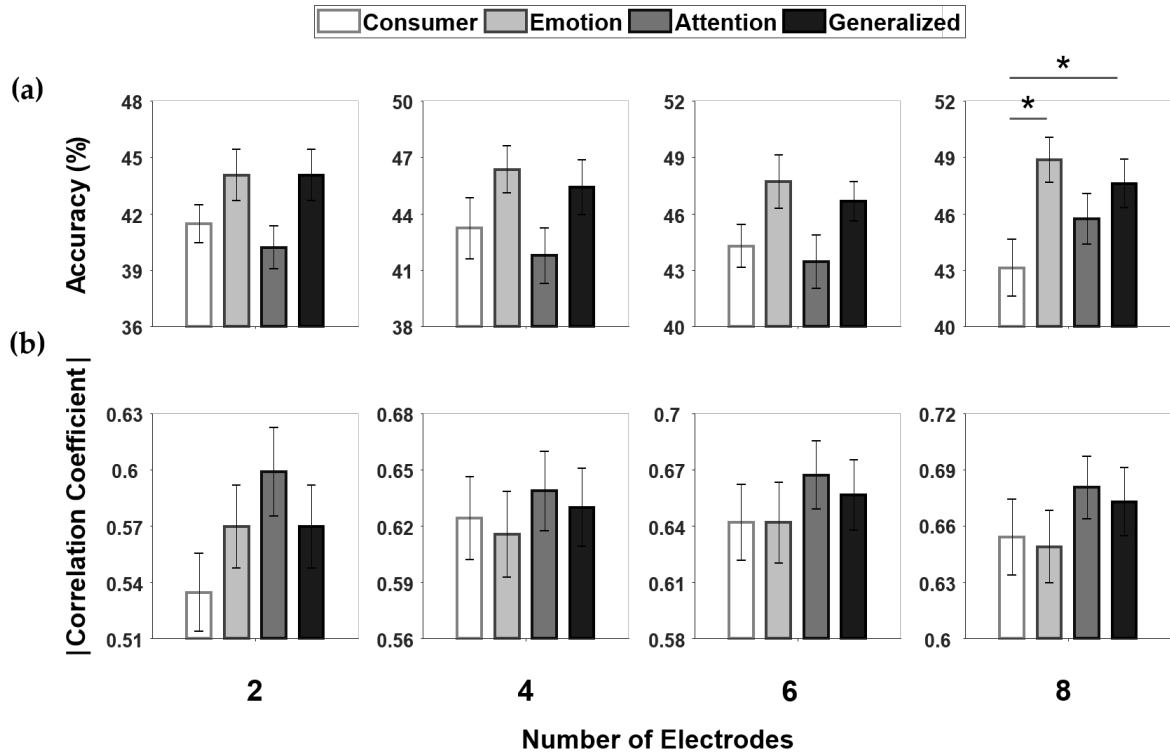

**Figure S3.** Comparison of LDA-based classification and estimation performances among the consumer EEG device (denoted as “Consumer”), emotion-specialized device (denoted as “Emotion”), attention-specialized device (denoted as “Attention”), and general-purpose device (denoted as “Generalized”), with different numbers of electrodes. The error bars indicate the standard errors across participants. (a) Classification accuracy calculated using emotion dataset; (b) absolute correlation coefficient calculated using attention dataset.

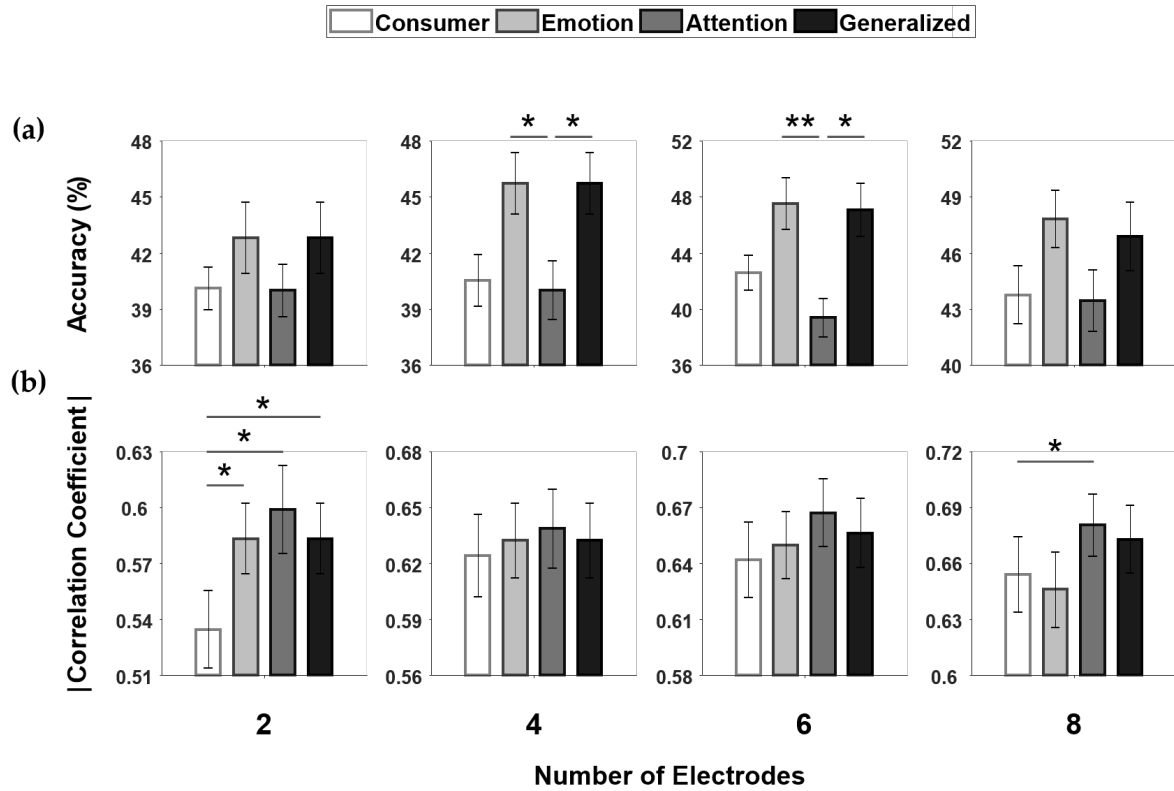

**Figure S4.** Comparison of DT-based classification and estimation performances among the consumer EEG device (denoted as “Consumer”), emotion-specialized device (denoted as “Emotion”), attention-specialized device (denoted as “Attention”), and general-purpose device (denoted as “Generalized”), with different numbers of electrodes. The error bars indicate the standard errors across participants. (a) Classification accuracy calculated using emotion dataset; (b) absolute correlation coefficient calculated using attention dataset.

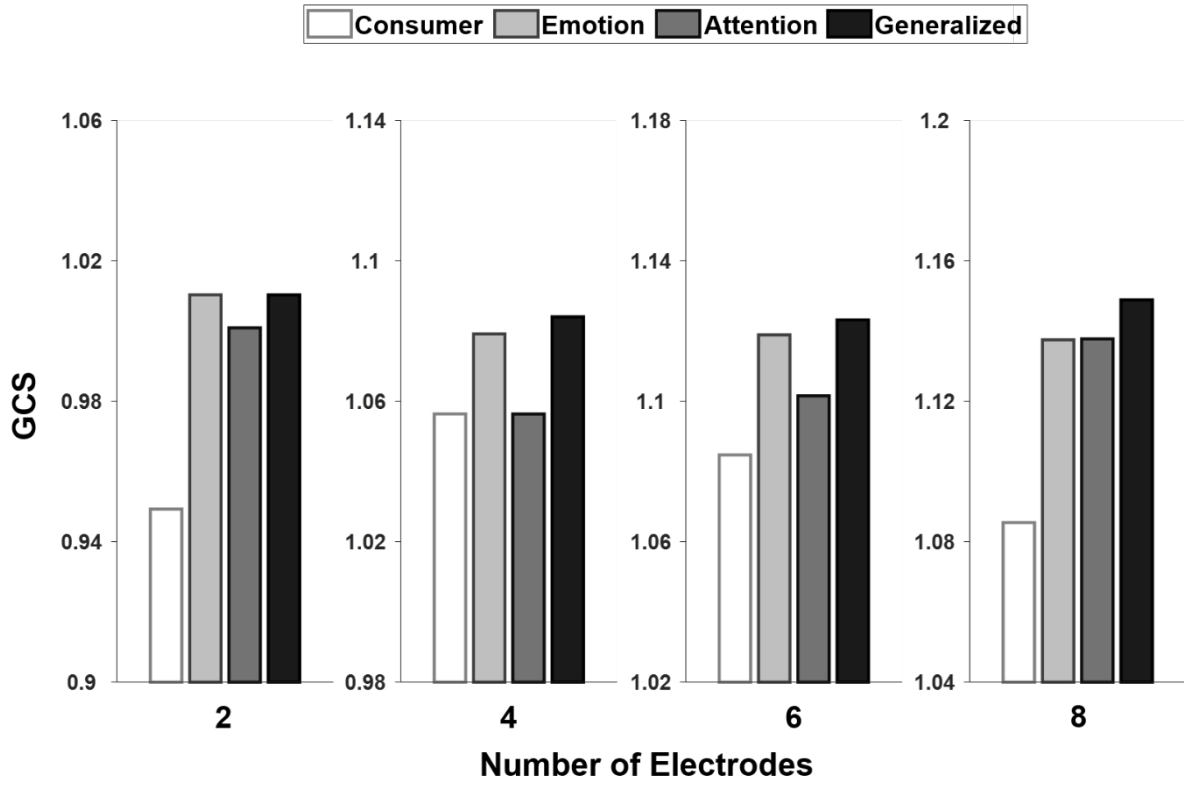

**Figure S5.** Comparison of LDA-based GCS values among the consumer EEG device (denoted as “Consumer”), emotion-specialized device (denoted as “Emotion”), attention-specialized device (denoted as “Attention”), and general-purpose device (denoted as “Generalized”), with different numbers of electrodes. There was only a single GCS value for each case.

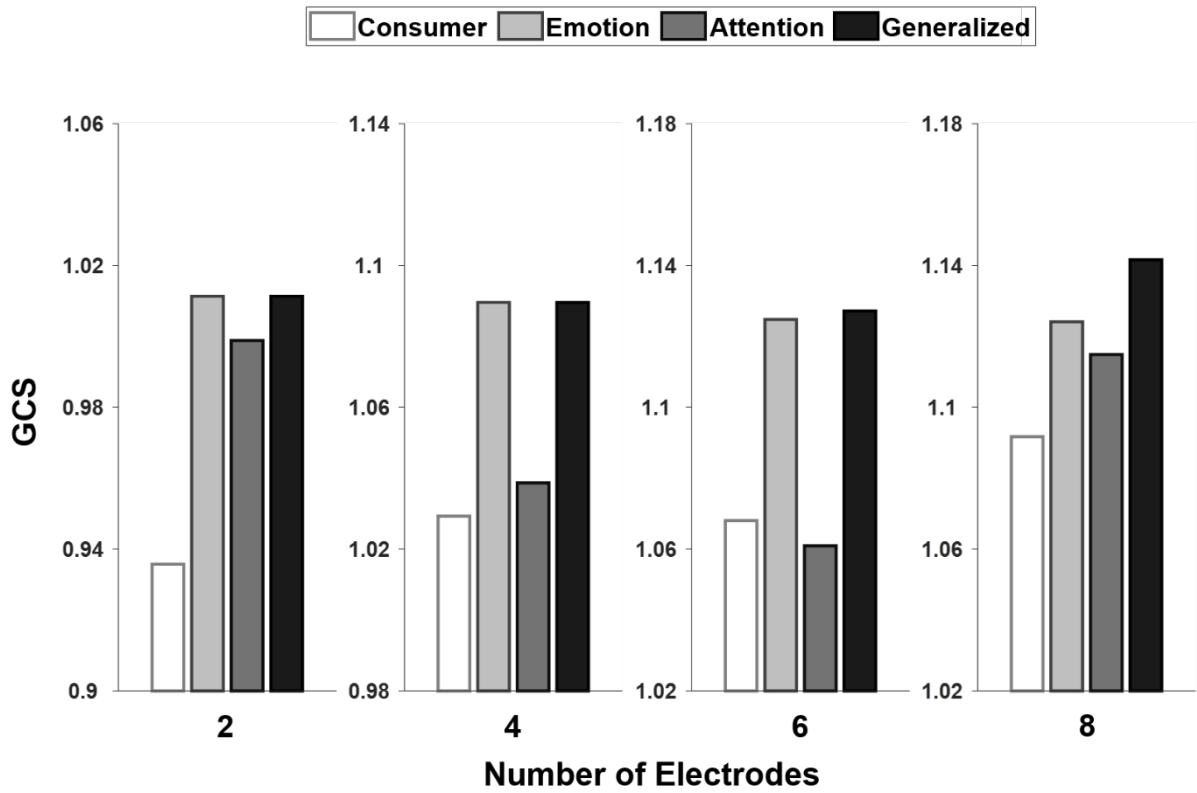

**Figure S6.** Comparison of DT-based GCS values among the consumer EEG device (denoted as “Consumer”), emotion-specialized device (denoted as “Emotion”), attention-specialized device (denoted as “Attention”), and general-purpose device (denoted as “Generalized”), with different numbers of electrodes. There was only a single GCS value for each case.
